# Supplementary material for: GANFIS: The Ensemble model for Affective Classification
Source: Research Square preprint supplement (doi:10.21203/rs.3.rs-5002729/v1), 2024-10-01
Supplement: Supplementary file 1 [file 4abbe51e11a65d91fe14e5f9.docx]

**List of Tables**

Table1 Emotion class of different movie clips

| **Stimulus** | **Class** |
| --- | --- |
| La La land | Positive |
| Funny dogs | Positive |
| Slow life | Positive |
| Up | Negative |
| Marley and me | Negative |
| My girl | Negative |

Table 2 Emotion categories for DEAP dataset

| Emotion Category | Valence | Arousal |
| --- | --- | --- |
| Happy | Greater than 5.5 | Greater than 5.5 |
| Relaxed | Greater than 5.5 | Less than 4.5 |
| Sad | Less than 5.5 | Less than 4.5 |
| Fear | Less than 4.5 | Greater than 5.5 |

Table3 Accuracy, sensitivity, specificity and MSE rates for the first five features of the feeling dataset

| **[GANFIS]+Adaptive Network** | **Accuracy (%)** | **Sensitivity (%)** | **Specificity (%)** | **MSE** |
| --- | --- | --- | --- | --- |
| [GAN+ANFIS]+RBFNN | 91.38 | 87.84 | 94.87 | 0.0797 |
| [GAN+ANFIS]+ANFIS (Number of MFs: 5 5 5) | 93.72 | 93.52 | 96.83 | 0.0679 |
| [GAN+ANFIS]+PNN | 96.38 | 96.01 | 97.58 | 0.0438 |
| [GAN+ANFIS]+ANFIS (Number of MFs: 3 3 3) | 97.37 | 96.04 | 98.31 | 0.0213 |

Table 4 Accuracy, sensitivity, specificity and MSE rates for the first three features of the

Feeling Emotions dataset

| **[GANFIS]+Adaptive Network** | **Accuracy (%)** | **Sensitivity (%)** | **Specificity (%)** | **MSE** |
| --- | --- | --- | --- | --- |
| [GAN+ANFIS]+RBFNN | 92.56 | 87.01 | 88.51 | 0.7932 |
| [GAN+ANFIS]+ANFIS (Number of MFs: 555) | 93.87 | 95.01 | 95.73 | 0.0696 |
| [GAN+ANFIS]+PNN | 96.23 | 93.61 | 95.97 | 0.0485 |
| [GAN+ANFIS]+ANFIS (Number of MFs: 333) | 96.63 | 93.01 | 95.13 | 0.2032 |

(ANFIS membership function number (555))

Table5 Accuracy, sensitivity, specificity and MSE rates for the first three features of the feeling emotions dataset

| **[GANFIS]+Adaptive Network** | **Accuracy (%)** | **Sensitivity (%)** | **Specificity (%)** | **MSE** |
| --- | --- | --- | --- | --- |
| [GAN+ANFIS]+RBFNN | 91.74 | 87.04 | 88.20 | 0.1540 |
| [GAN+ANFIS}+ANFIS (Number of MFs:333) | 92.89 | 87.68 | 93.63 | 0.1090 |
| [GAN+ANFIS]+PNN | 95.51 | 94.93 | 96.74 | 0.0399 |

(ANFIS membership function number (333))

Table6 Comparison of the accuracy for three classes on the feeling emotions dataset

| **Authors** | **Classifier** | **Accuracy (%)** |
| --- | --- | --- |
| Qing et al [24] | Decision Tree | 75.00 |
| Luo et al [26] | SVM | 86.96 |
| Li e tal [25]  Zhong et al [23]  Proposed Method | SVM  RGNN  [GAN+ANFIS]+ ANFIS (Number of MFs: 333) | 88.06  94.24  96.63 |

Table7 Comparison of the accuracy for four classes on the DEAP dataset

| **Authors** | **Classifier** | **Accuracy (%)** |
| --- | --- | --- |
| Mehmood et al [42] | KNN | 61.00 |
| Islam and Ahmad [30]  Liu and Sourina [27] | KNN  SVM | 62.30  63.04 |
| Nakisha et al [35]  Zheng et al [28]  Proposed Method | PNN  KNN, SVM  [GAN+ANFIS]+ANFIS (Number of MFs: 3 3 3 3) | 67.40  69.67  74.69 |

Table8Accuracy, sensitivity, specificity and MSE rates for the first five features of the DEAP dataset

| **[GANFIS]+Adaptive Network** | **Accuracy (%)** | **Sensitivity (%)** | **Specificity (%)** | **MSE** |
| --- | --- | --- | --- | --- |
| [GAN+ANFIS]+RBFNN | 70.43 | 62.31 | 81.24 | 0.3954 |
| [GAN+ANFIS]+ANFIS(Number of MFs:5555) | 71.27 | 67.62 | 86.15 | 0.4857 |
| [GAN+ANFIS]+PNN | 73.26 | 65.43 | 85.41 | 0.2953 |
| [GAN+ANFIS]+ANFIS(Number of MFs:3333) | 74.69 | 64.02 | 87.02 | 0.2903 |
